# Supplementary material for: Effects of acute physical exercise on oxidative stress and inflammatory status in young, sedentary obese subjects
Source: PLoS One. 2017 Jun 5;12(6):e0178900. doi: 10.1371/journal.pone.0178900 (PMC5459463; doi:10.1371/journal.pone.0178900)
Supplement: S1 Data — (XLSX) [file pone.0178900.s001.xlsx]

## Sheet: Normal Weight
Samples	Age (yrs)	BMI (kg/m2)	SBP (mmHg)	DBP (mmHg)	Basal HR (bpm)	Calculated HR max (bpm)	80% HR max (bpm)	3-min HR (bpm)	Glucose (mg/dL)	LDL-cholesterol (mg/dL)	HDL-cholesterol (mg/dL)	Triglyceride (mg/dL)	Creatinine (mg/dL)	IL4 (pg/ml) pre	IL4 (pg/ml) post	IL6 (pg/ml) pre	IL6 (pg/ml) post	IL-8 (pg/ml) pre	IL-8 (pg/ml) post	VEGF(pg/ml) pre	VEGF(pg/ml) post	INFγ (pg/ml) pre	INFγ (pg/ml) post	TNFα (pg/ml) pre	TNFα (pg/ml) post	MCP1(pg/ml) pre	MCP1(pg/ml) post	EGF (pg/ml) pre	EGF (pg/ml) post	GPx (U/l) pre	GPx (U/l) post	GR (U/l) pre	GR (U/l) post	TAS (mmol/l) pre	TAS (mmol/l) post	SOD (U/ml) pre	SOD (U/ml) post	Energy (Kcal/die)	Carbohydrates (g/die)	Lipid (g/die)	Protein (g/die)	Selenium (μg/die)	Vitamin C (mg/die)	Vitamin E (mg/die)
1	26	21.5	120	80	88	194	155.2	122	74	98	56	88	1.1	2.45	1.55	1.39	3.78	49.48	9.63	418.21	281.84	2.94	3.65	6.32	7.36	261.29	212.24	173.64	137.37	381.25	342.23	68.44	64.29	2	1.95	108	113	2200	340	65	100	35	188	12
2	26	22.9	130	80	86	194	155.2	140	86	119	50	62	0.7	0	7.4	1.31	2.56	55.92	68.9	24.49	25.67	21.59	10.93	11.97	5.45	290.6	195.21	94.35	154.7	444.19	441.81	58.3	60.2	1.99	2.03	150	133	1200	210	34	45	20	190	15
3	24	22.41	130	90	51	196	156.8	91	89	77	78	33	1.1	0	6.9	0.67	6.02	38.08	39.9	59.63	68.07	5.22	3.77	12.66	10	283.41	238.11	189.83	141.74	164.72	194.86	49.19	53.95	1.98	2.01	91	100	1750	210	45	48	50	198	11
4	28	24.1	130	70	100	192	153.6	133	87	157	70	84	1.2	0	1.55	0.74	0.78	10.57	17.97	69.39	66.3	12.82	9.47	13.71	10.24	482.38	420.7	179.41	170	281.71	293.75	59.38	57.4	1.98	1.9	58	101	2200	210	80	100	55	90	18
5	26	23.9	120	80	64	194	155.2	88	75	76	62	53	0.9	0	1.55	1.09	1.24	35.25	28.58	101.19	115.8	3.53	2.24	8.97	5.87	263.83	257.69	198.32	181.45	343.98	457.67	49.19	52.3	2.08	2.08	117	102	2250	240	85	60	20	90	19
6	32	24.77	130	90	55	188	150.4	110	92	96	43	222	1	3.43	1.48	2.51	1.27	5.9	54.69	193.93	42.27	4.49	2.15	8.74	3.36	301.15	277.38	172.73	108.3	295.73	344.64	54	55.94	1.58	1.72	91	137	1600	250	80	60	50	86	10
7	28	24.05	130	90	58	192	153.6	98	87	133	75	148	1	0.9	1.58	1.92	6.94	58.21	63.58	279.98	289.03	2.14	2.03	6.92	7.73	349.15	178.9	120.09	115.49	318.555	345.788	50.69	54.9	1.97	2.01	118	137	2400	340	78	100	20	88	10
8	29	23.95	130	80	85	191	152.8	145	81	78	52	108	0.9	0	1.31	1.55	1.22	10.45	8.56	28.61	21.36	6.95	2.07	7.31	3.4	430.05	363.33	162.42	136.23	170.34	190.23	51.18	53.92	1.98	1.92	80	105	1950	250	80	65	20	85	16
9	21	22.05	120	90	101	199	159.2	120	75	132	48	50	1	0	1.15	1.05	1.72	14.95	12.65	35.97	118.12	20.87	0	6.87	8.26	268.94	373.64	164.82	132.27	432.19	445.68	55.33	55.63	1.79	1.84	71	118	2350	210	86	60	17	88	12
10	25	20.8	130	70	52	195	156	89	92	72	64	55	0.9	2.56	1.65	0.7	0.69	46.61	40.01	325.34	120.87	3.79	2.01	6.97	11.98	206.71	294.72	224.83	200.12	352.48	400.7	68.52	64.87	1.99	1.98	141	97	1500	210	90	100	50	95	16

## Sheet: Overweight-Moderate obesity
Samples	Age (yrs)	BMI (kg/m2)	SBP (mmHg)	DBP (mmHg)	Basal HR (bpm)	Calculated HR max (bpm)	80% HR max (bpm)	3-min HR (bpm)	Glucose (mg/dL)	LDL-cholesterol (mg/dL)	HDL-cholesterol (mg/dL)	Triglyceride (mg/dL)	Creatinine (mg/dL)	IL4 (pg/ml) pre	IL4 (pg/ml) post	IL6 (pg/ml) pre	IL6 (pg/ml) post	IL-8 (pg/ml) pre	IL-8 (pg/ml) post	VEGF(pg/ml) pre	VEGF(pg/ml) post	INFγ (pg/ml) pre	INFγ (pg/ml) post	TNFα (pg/ml) pre	TNFα (pg/ml) post	MCP1(pg/ml) pre	MCP1(pg/ml) post	EGF (pg/ml) pre	EGF (pg/ml) post	GPx (U/l) pre	GPx (U/l) post	GR (U/l) pre	GR (U/l) post	TAS (mmol/l) pre	TAS (mmol/l) post	SOD (U/ml) pre	SOD (U/ml) post	Energy (Kcal/die)	Carbohydrates (g/die)	Lipid (g/die)	Protein (g/die)	Selenium (μg/die)	Vitamin C (mg/die)	Vitamin E (mg/die)
1	23	25.5	114.8	70	64	197	157.6	105	74	132	38	73	0.7	0	2.87	2.13	2.51	7.35	8.29	55.27	38.96	6.23	6.06	8.74	2.23	473.1	467.72	106.22	34.15	157.47	135.45	70.05	64.3	1.56	1.5	22	18	2800	340	108	105	35	44	10
2	43	25.6	130	70	65	177	141.6	120	83	117	35	60	1.1	1.85	0	1.92	1.98	6.19	6.67	115.01	144.19	4.79	6.45	12.13	14.39	213.11	249.26	114.63	135.33	320.53	331.25	59.87	68.02	1.91	1.98	132	93	2620	230	92	80	78	140	14
3	35	26.0617	120	84.5	75	185	148	120	93	129	49	89	0.9	0	3.89	1.01	1.24	3.81	7.97	90.38	78.72	3.63	3.34	3.27	1.59	291.23	317.69	91.53	14.22	218.78	119.38	56.43	54.15	2.28	2.21	70	63	2600	280	50	60	25	235	14
4	43	26.54	130	70	64	177	141.6	110	84	89	28	225	0.9	3.44	6.48	2.34	2.92	8.1	19.74	302.67	261.84	31.15	2.1	21.14	2.48	576.11	572.14	121.78	169.82	529.36	293.93	66.29	68.66	2.15	2.12	82	30	1670	155	85	125	45	46	8
5	40	31.12	135	80	66	180	144	106	104	112	33	344	0.9	1.48	2.02	1.93	1.57	49.3	40.77	128.15	111.65	35.63	2.36	20.92	2.29	578.93	528.75	158.69	136.37	385.62	383.9	50.27	52.3	2.08	2.12	124	137	1678	140	85	87	15	140	19
6	43	31.9	120	70	61	177	141.6	106	107	186	41	322	0.9	1.85	2.44	1.07	1.12	9.26	11.43	165.38	151.94	5.67	0	1.75	0.67	78.47	70.64	20.58	5.22	325.87	346.49	50.65	53.62	1.91	1.76	98	141	1880	250	105	100	75	140	10
7	29	32.61	120	70	83	191	152.8	120	101	120	56	77	1.1	3.29	2.48	1.85	1.75	10.23	10.94	315.05	259.57	9.24	3.15	8.21	1.56	251.66	274.24	106.66	28.27	264.96	217.85	56.22	54.2	2.28	2.2	86	89	2090	250	78	60	75	235	20
8	28	31.6				192	153.6		77	178	45	298	1	1.18	2.16	1.53	1.72	46.45	21.39	84.68	81.64	6.72	7.74	8.45	2.06	363.97	309.49	24.75	7.76	385.39	249.83	70.59	69.98	2.18	2.26	96	43	1660	300	88	87	27	140	17
9	43	27.8	130	70	76	177	141.6	125	97	89	28	70	0.7	1.04	2.06	1.78	1.93	46.16	27.38	93.46	86.75	4.27	2.12	13.81	3.21	75.69	115.17	142.72	86.865	149.15	142.13	56.25	52.27	1.89	1.81	72	144	1700	250	88	80	41	120	12
10	39	25.3	140	105	60	181	144.8	105	92	127	55	325	0.8	0	2.33	2.07	2.54	5.89	11.29	98.94	92.84	5.26	2.31	3.29	2.17	242.06	276.12	109.61	79.34	408.72	391.27	57.22	55.39	1.93	1.87	106	63	1250	155	15	35	37	144	20

## Sheet: Severe obesity
Samples	Age (yrs)	BMI (kg/m2)	SBP (mmHg)	DBP (mmHg)	Basal HR (bpm)	Calculated HR max (bpm)	80% HR max (bpm)	3-min HR (bpm)	Glucose (mg/dL)	LDL-cholesterol (mg/dL)	HDL-cholesterol (mg/dL)	Triglyceride (mg/dL)	Creatinine (mg/dL)	IL4 (pg/ml) pre	IL4 (pg/ml) post	IL6 (pg/ml) pre	IL6 (pg/ml) post	IL-8 (pg/ml) pre	IL-8 (pg/ml) post	VEGF(pg/ml) pre	VEGF(pg/ml) post	INFγ (pg/ml) pre	INFγ (pg/ml) post	TNFα (pg/ml) pre	TNFα (pg/ml) post	MCP1(pg/ml) pre	MCP1(pg/ml) post	EGF (pg/ml) pre	EGF (pg/ml) post	GPx (U/l) pre	GPx (U/l) post	GR (U/l) pre	GR (U/l) post	TAS (mmol/l) pre	TAS (mmol/l) post	SOD (U/ml) pre	SOD (U/ml) post	Energy (Kcal/die)	Carbohydrates (g/die)	Lipid (g/die)	Protein (g/die)	Selenium (μg/die)	Vitamin C (mg/die)	Vitamin E (mg/die)
1	24	35.1	135	70	72	196	156.8	125	87	156	45	63	1	1.76	0	1.21	1.24	11.35	11.03	106.01	131.45	2.21	3.44	5.7	1.59	219.09	180.74	118.94	23.3	334.07	354.16	55.47	56.98	2.23	2.16	45	119	3600	450	160	160	70	184	17
2	28	35.8	150	90	67	192	153.6	110	93	108	35	142	0.9	2.78	2.96	1.43	1.18	6.59	6.84	345.94	298.43	13.42	3.53	20.69	4.77	368.68	329.71	179.66	83.68	366.19	377.03	63.67	68.58	1.94	1.89	112	138	1850	230	60	67	20	205	16
3	40	35.8	130	90	70	180	144	112	111	177	41	183	1	0	0	1.35	1.24	40.76	65.35	147.48	180.91	19.04	3.21	19.99	2.56	430.17	552.68	156.36	165.2	296.92	260.03	62.97	66.18	2.05	2.02	123	114	1850	225	85	70	20	205	16
4	30	36.04	130	80	72	190	152	150	91	106.4	48	113	1	3.43	0	1.52	2.14	8.13	14.48	216.51	270.91	5.18	0	2.22	2.86	436.41	505.34	75.1	15.42	261.26	343.34	55.67	55.42	2.29	2.31	30	82	3600	450	160	160	70	282	18
5	37	36.9	120	80	71	183	146.4	136	117	99	62	62	0.7	0	0	0.85	0.98	1.82	2.07	20.66	18.76	0	0	4.27	3.03	90.76	95.96	101.94	62.7	373.49	376.58	82.67	87.79	1.53	1.57	126	136	2000	300	80	150	37	205	12
6	39	37	140	90	70	181	144.8	112	82	99	40	92	0.8	2.58	2.85	1.53	1.55	11.27	9.75	65.63	71.17	18	1.93	24.85	2.06	286.75	364.87	163.13	107.66	149.42	147.11	76.8	78.95	1.52	1.54	33	28	1900	300	70	40	37	140	12
7	27	46	130	100	85	193	154.4	176	109	121	45	80	0.5	2.22	0.74	4.98	6.06	6.06	14.66	105.69	153.25	4.25	10.36	7.13	8.51	264.18	253.37	114.09	107.95	433.21	377.69	76	80.06	2	1.98	143	111	2000	224	45	46	15	80	12
8	40	40	140	80	81	180	144	105	116	165	52	162	1.1	2.67	0.77	3.5	4.52	30.15	40.18	107.39	139.39	19.78	9.71	5.02	1.12	298.24	455.67	76.86	46.97	387.64	388.35	70.83	60.02	1.75	1.78	20	58	1900	300	100	38	25	130	16
9	26	37.5	125	80	68	194	155.2	120	90	104	42	64	0.7	1.68	0.91	0.91	1.46	5.04	5.15	105.29	88.68	4.22	4.25	5.96	3.05	147.88	92.56	159.42	154.71	187.32	200.39	57.84	65.41	2.31	2.02	122	108	1900	200	90	38	20	150	16
10	30.4	36.2	135	95	72	189.6	151.68	125	89	102	41	89	0.8	2.52	0.71	1.05	0.19	2.03	3.65	318.49	348.12	2.62	3.39	25.32	6.78	451.47	429.74	153.23	40.25	373.23	369.45	73.94	86.03	1.63	1.94	120	149	3500	340	150	130	60	40	16
